# Supplementary material
Source: Springer Nature journal article supplement (https://www.springermedizin.de/resource/supplementary/12885_2011_3098_MOESM10_ESM.pdf/9463230)

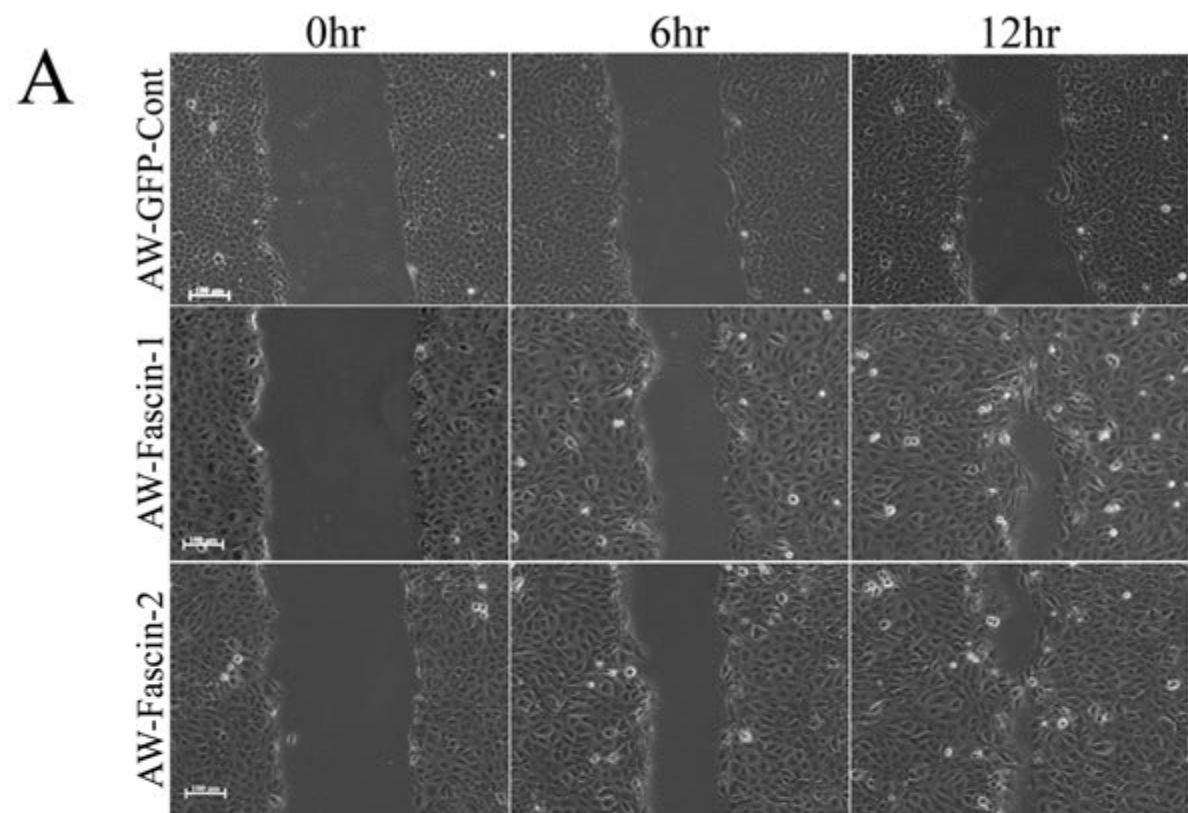

**B**

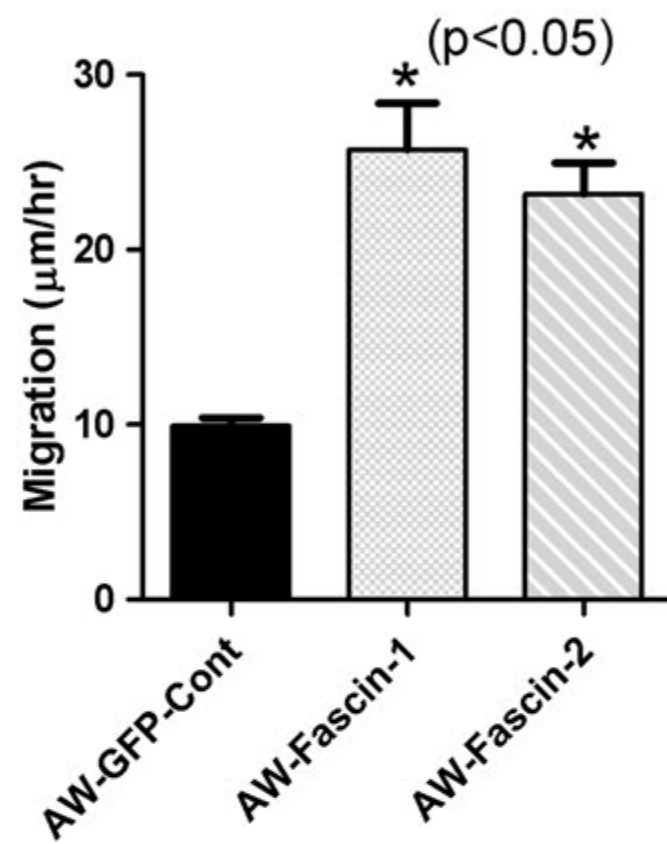

**C**

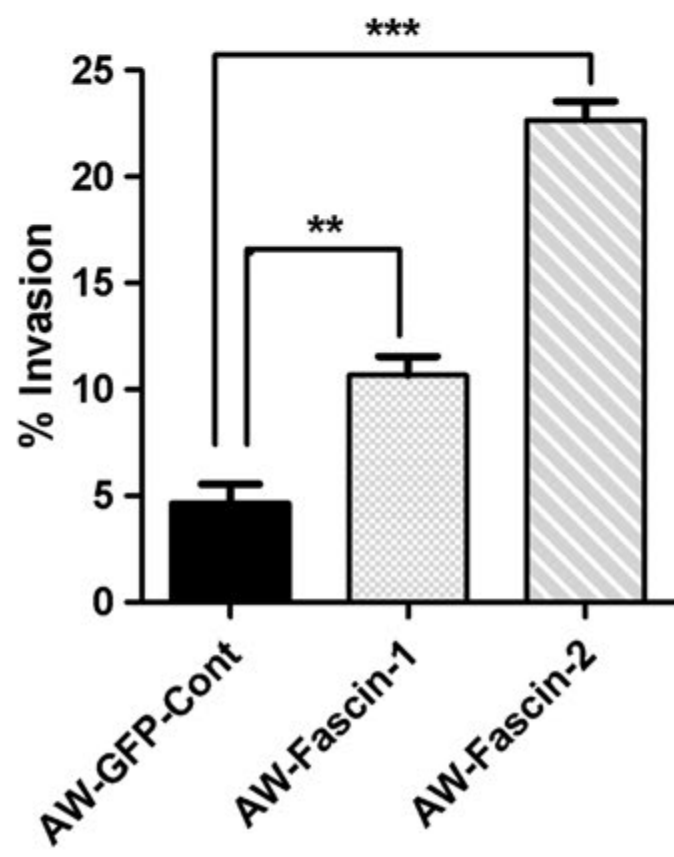

**D**

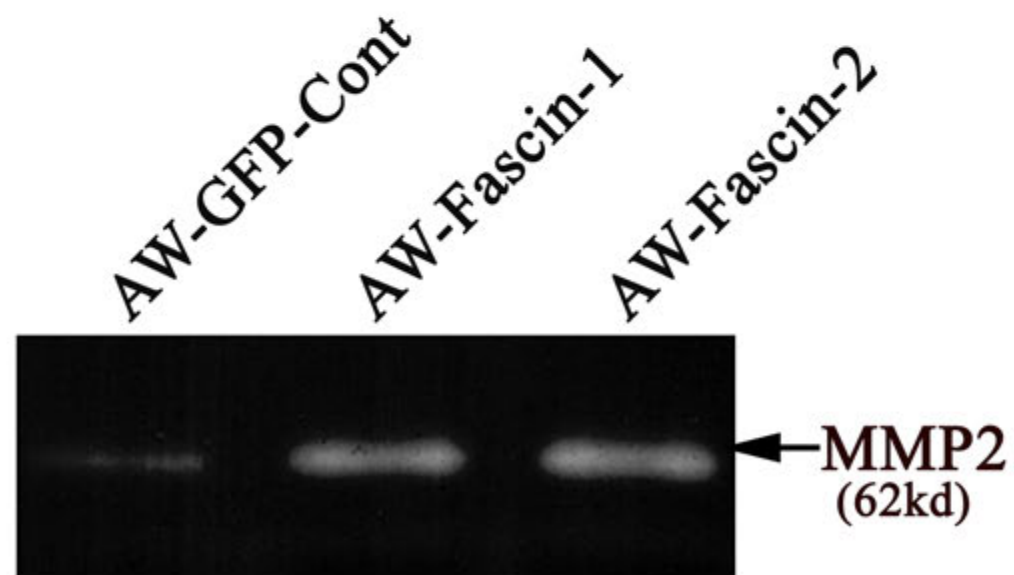

Supplement: MOESM10 [file 9463230]
